# Supplementary material
Source: publisher figshare collection journal article supplement (https://brill.figshare.com/ndownloader/files/31640114)
Supplement: Supplementary file 1 [file 31640114]

# **Crossmodal Correspondence Between Auditory Timbre and Visual Shape**

**Daniel Gurman \*, Colin R. McCormick \*\* and Raymond M. Klein \*\*\***

Department of Psychology and Neuroscience, Dalhousie University, B3H 4R2, Halifax, NS,  
Canada

Received 25 February 2021; accepted 24 November 2021

\* To whom correspondence should be addressed. E-mail: daniel.gurman1@gmail.com

\*\* ORCID: 0000-0001-7326-2560

\*\*\* ORCID: 0000-0002-3854-4498

## **Supplementary Material**

For all 12 ANOVAs presented in this document, p-values were measured against an alpha of 0.05. The purpose of these ANOVAs is primarily descriptive - we are not using them to test specific hypotheses. That noted, readers interested in the influence of multiple comparisons may want to measure the reported p-values against the Bonferroni corrected alpha of 0.004 (0.05/12). However, this correction does not affect the significance of any effects reported here.

*S1*: Shape: Recognizable-Arbitrary scale

| Predictor               | df <sub>Num</sub> | df <sub>Den</sub> | SS <sub>Num</sub> | SS <sub>Den</sub> | F     | p    | $\eta^2_{\epsilon}$ |
|-------------------------|-------------------|-------------------|-------------------|-------------------|-------|------|---------------------|
| baseshape               | 3                 | 141               | 37734.37          | 91966.72          | 19.28 | .000 | .07                 |
| sptransform             | 5                 | 235               | 131205.70         | 97038.87          | 63.55 | .000 | .25                 |
| baseshape x sptransform | 15                | 705               | 21634.05          | 144730.04         | 7.03  | .000 | .04                 |

| Recognizable<br>(Lower) | Arbitrary<br>(Higher) | Shape |        |        |      |
|-------------------------|-----------------------|-------|--------|--------|------|
|                         |                       | Bug   | Curves | Jagged | Star |
| <b>Transform</b>        | Base                  | 69.5  | 55.4   | 50     | 58   |
|                         | Familiar              | 50.9  | 27.7   | 21.8   | 33.4 |
|                         | Fuzzy                 | 71.7  | 66.6   | 57.7   | 66.2 |
|                         | Hollow                | 69.2  | 58.9   | 50.6   | 61.1 |
|                         | Smooth                | 67.8  | 50.2   | 49.3   | 61.4 |
|                         | Symmetrical           | 42.2  | 50.8   | 46.4   | 43.9 |

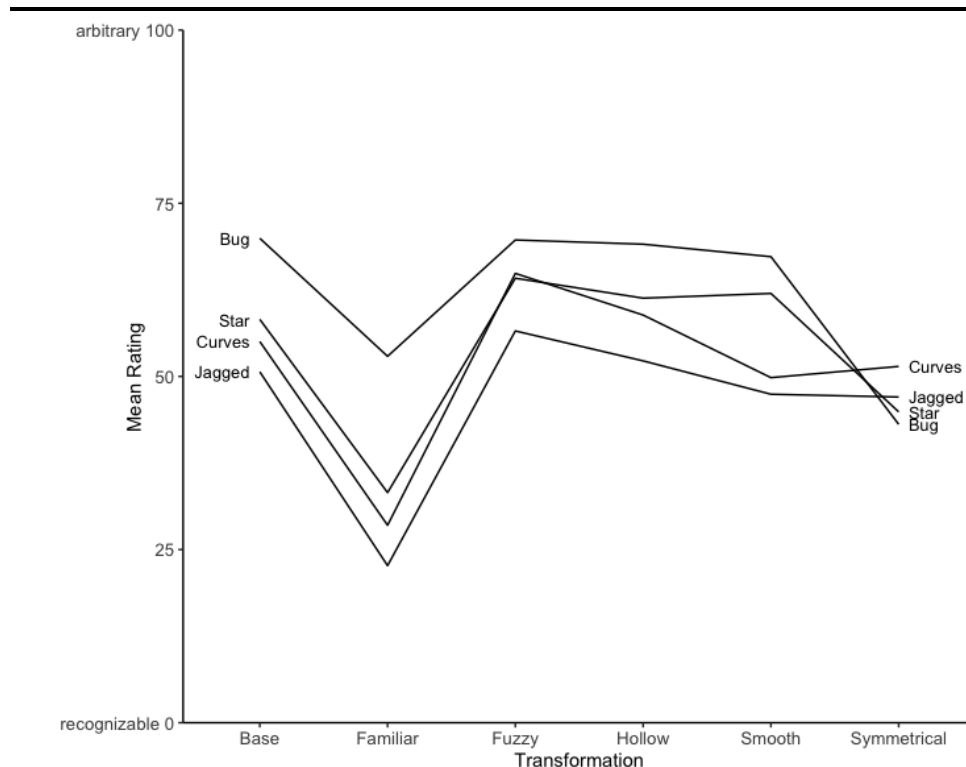

The familiar transformation made shapes more recognizable. This effect was less marked for the Bug shape. The symmetrical transform made the Star and Bug shapes more recognizable.

## S2: Shape: Soft-Harsh Scale

| Predictor               | df <sub>Num</sub> | df <sub>Den</sub> | SS <sub>Num</sub> | SS <sub>Den</sub> | F     | p    | $\eta^2_g$ |
|-------------------------|-------------------|-------------------|-------------------|-------------------|-------|------|------------|
| baseshape               | 3                 | 141               | 112343.23         | 69420.44          | 76.06 | .000 | .22        |
| sptransform             | 5                 | 235               | 29483.25          | 119663.20         | 11.58 | .000 | .06        |
| baseshape x sptransform | 15                | 705               | 46506.91          | 132935.50         | 16.44 | .000 | .09        |

| Soft<br>Lower    | Harsh<br>Higher | Shape |        |        |      |
|------------------|-----------------|-------|--------|--------|------|
|                  |                 | Bug   | Curves | Jagged | Star |
| <b>Transform</b> | Base            | 69.2  | 35.4   | 74.2   | 65.1 |
|                  | Familiar        | 51.1  | 49.7   | 59.9   | 45.5 |
|                  | Fuzzy           | 66.1  | 48.7   | 72.5   | 63.2 |
|                  | Hollow          | 69.4  | 42.6   | 74.8   | 66.5 |
|                  | Smooth          | 67.3  | 33.9   | 42.9   | 59.4 |
|                  | Symmetrical     | 59.7  | 35     | 70.8   | 58   |

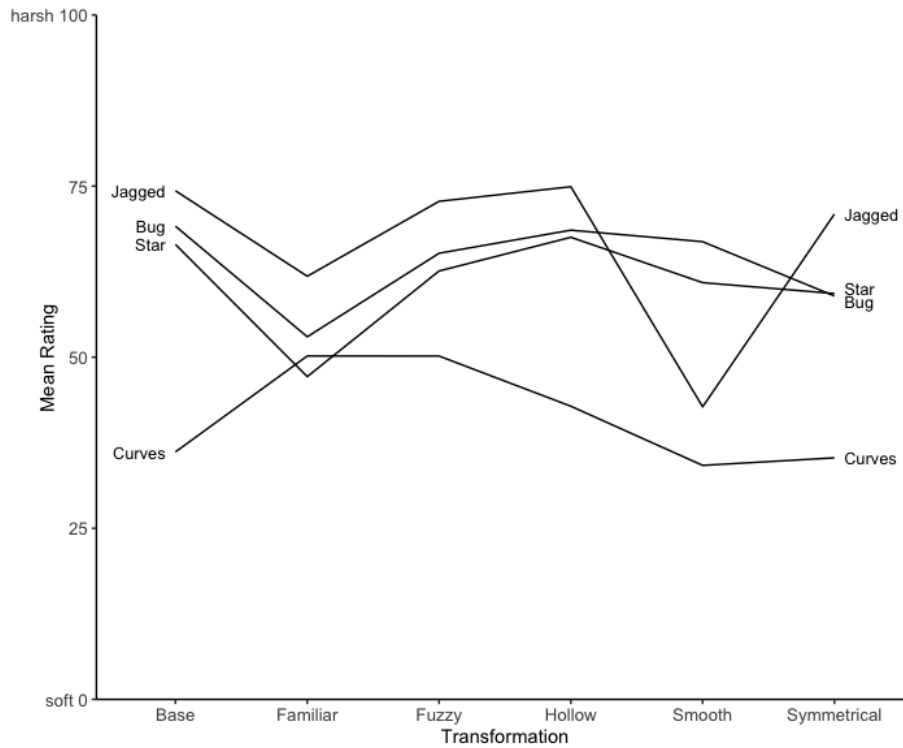

The familiar increased the softness of shapes except for the Curves shape which was already the softest. The smooth transform only increased the softness for the Jagged shape.

### S3: Shape: Balanced-Unbalanced Scale

| Predictor               | df <sub>Num</sub> | df <sub>Den</sub> | SS <sub>Num</sub> | SS <sub>Den</sub> | F      | p    | $\eta^2_g$ |
|-------------------------|-------------------|-------------------|-------------------|-------------------|--------|------|------------|
| baseshape               | 3                 | 141               | 44793.57          | 44001.23          | 47.85  | .000 | .07        |
| sptransform             | 5                 | 235               | 293201.31         | 109012.99         | 126.41 | .000 | .46        |
| baseshape x sptransform | 15                | 705               | 44247.20          | 99415.71          | 20.92  | .000 | .07        |

| Balanced<br>Lower | Unbalanced<br>Higher | Shape |        |        |      |
|-------------------|----------------------|-------|--------|--------|------|
|                   |                      | Bug   | Curves | Jagged | Star |
| <b>Transform</b>  | Base                 | 77.7  | 60.4   | 73.5   | 67.2 |
|                   | Familiar             | 64.2  | 31.1   | 24.9   | 31.2 |
|                   | Fuzzy                | 80    | 67.8   | 73.2   | 73.5 |
|                   | Hollow               | 79.2  | 60.2   | 67.5   | 68.7 |
|                   | Smooth               | 77.5  | 48.6   | 66     | 68.7 |
|                   | Symmetrical          | 29.9  | 36.5   | 37.4   | 32.8 |

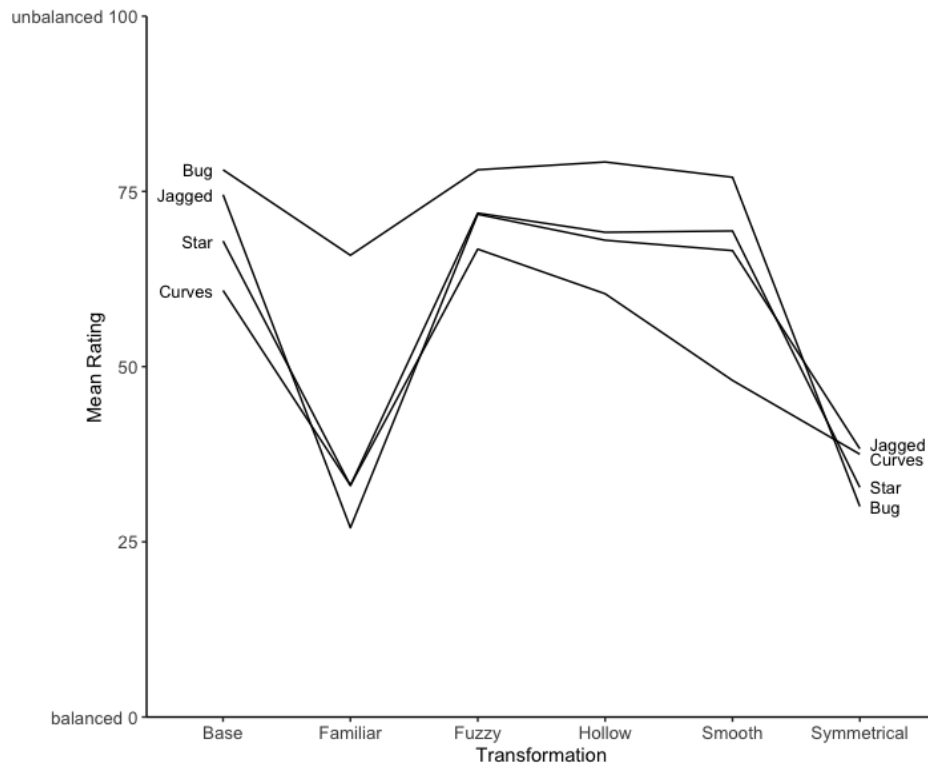

The familiar transform increased balance for all shapes, with the smallest effect for the Bug shape. The symmetrical transform increased balance for all shapes.

#### S4: Shape: Hollow-Solid Scale

| Predictor               | df <sub>Num</sub> | df <sub>Den</sub> | SS <sub>Num</sub> | SS <sub>Den</sub> | F     | p    | $\eta^2_g$ |
|-------------------------|-------------------|-------------------|-------------------|-------------------|-------|------|------------|
| baseshape               | 3                 | 141               | 12849.50          | 64658.72          | 9.34  | .000 | .02        |
| sptransform             | 5                 | 235               | 93165.08          | 220508.20         | 19.86 | .000 | .18        |
| baseshape x sptransform | 15                | 705               | 8346.72           | 115105.85         | 3.41  | .000 | .02        |

| Hollow<br>Lower  | Solid<br>Higher | Shape |        |        |      |
|------------------|-----------------|-------|--------|--------|------|
|                  |                 | Bug   | Curves | Jagged | Star |
| <b>Transform</b> | Base            | 68.2  | 61     | 74.8   | 68.1 |
|                  | Familiar        | 68.2  | 76.1   | 82.8   | 70.3 |
|                  | Fuzzy           | 53.1  | 56.5   | 61.4   | 53.7 |
|                  | Hollow          | 49.2  | 41.6   | 56     | 47.2 |
|                  | Smooth          | 66.7  | 62.6   | 66.7   | 68.5 |
|                  | Symmetrical     | 71.4  | 66.1   | 76     | 72.5 |

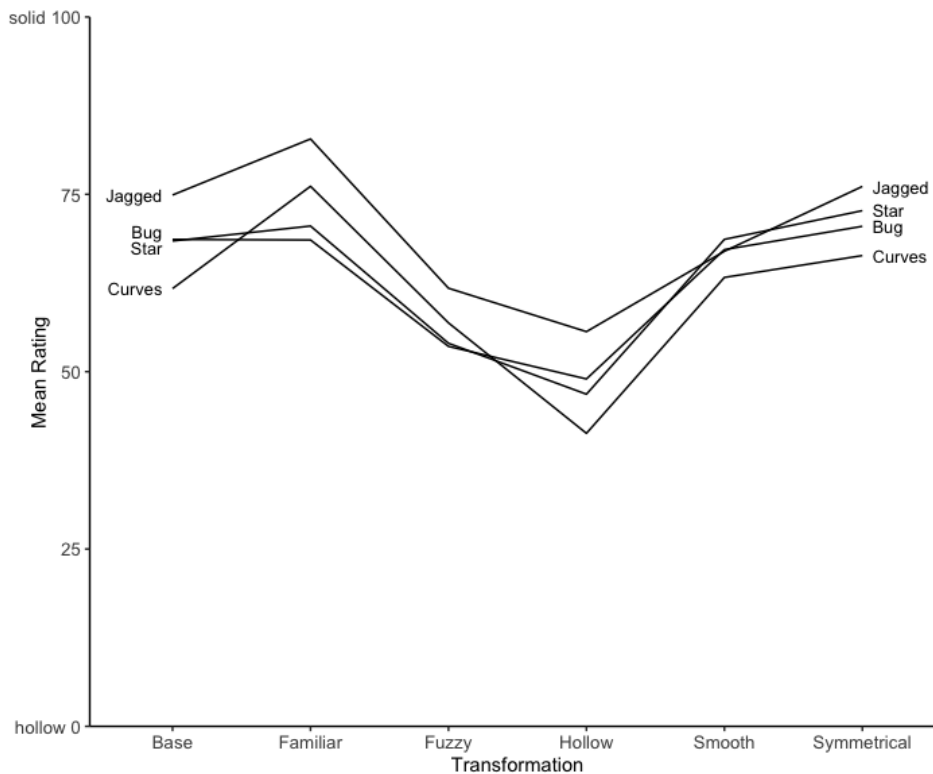

Solidness was decreased by the fuzzy and hollow transforms while the familiar transform tended to increase solidness for all shapes.

# S5: Shape: Clear-Distorted Scale

| Predictor               | df <sub>Num</sub> | df <sub>Den</sub> | SS <sub>Num</sub> | SS <sub>Den</sub> | F     | p    | $\eta^2_g$ |
|-------------------------|-------------------|-------------------|-------------------|-------------------|-------|------|------------|
| baseshape               | 3                 | 141               | 21775.06          | 54359.99          | 18.83 | .000 | .04        |
| sptransform             | 5                 | 235               | 227288.73         | 146678.88         | 72.83 | .000 | .39        |
| baseshape x sptransform | 15                | 705               | 12728.68          | 126038.21         | 4.75  | .000 | .02        |

| Clear<br>Lower   | Distorted<br>Higher | Shape |        |        |      |
|------------------|---------------------|-------|--------|--------|------|
|                  |                     | Bug   | Curves | Jagged | Star |
| <b>Transform</b> | Base                | 51.3  | 47.9   | 43.5   | 46.5 |
|                  | Familiar            | 51.4  | 32.2   | 25.4   | 34.6 |
|                  | Fuzzy               | 81.6  | 71.9   | 79.2   | 77.6 |
|                  | Hollow              | 62.6  | 47.8   | 50.1   | 54   |
|                  | Smooth              | 55.1  | 39.1   | 43.9   | 47.3 |
|                  | Symmetrical         | 38.2  | 35.4   | 36.5   | 34.2 |

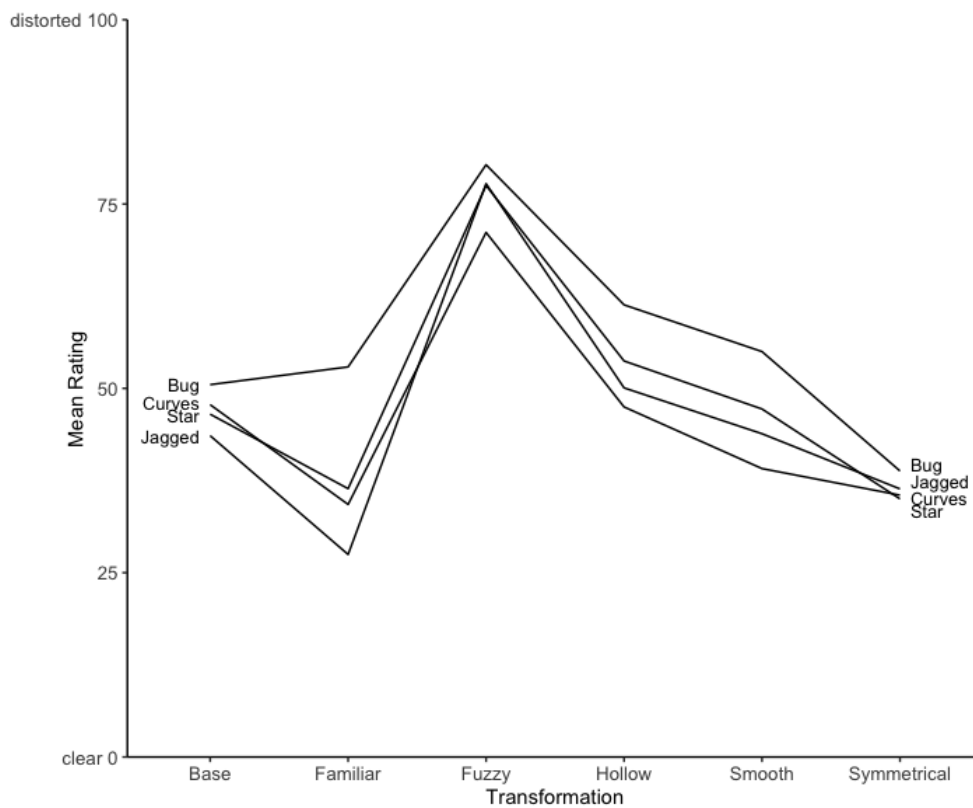

All shapes were rated as more distorted following the fuzzy transform while the familiar transform increases clearness for all shapes except the Bug.

# S6: Shape: Simple-Complex Scale

| Predictor               | df <sub>Num</sub> | df <sub>Den</sub> | SS <sub>Num</sub> | SS <sub>Den</sub> | F      | p    | $\eta^2_g$ |
|-------------------------|-------------------|-------------------|-------------------|-------------------|--------|------|------------|
| baseshape               | 3                 | 141               | 168153.32         | 65147.20          | 121.31 | .000 | .31        |
| sptransform             | 5                 | 235               | 76124.91          | 84841.52          | 42.17  | .000 | .14        |
| baseshape x sptransform | 15                | 705               | 34285.36          | 107507.71         | 14.99  | .000 | .06        |

| Simple           | Complex     | Shape |        |        |      |
|------------------|-------------|-------|--------|--------|------|
| Lower            | Higher      | Bug   | Curves | Jagged | Star |
| <b>Transform</b> | Base        | 76.5  | 39.8   | 71.7   | 58.8 |
|                  | Familiar    | 75    | 31.1   | 34.4   | 36.9 |
|                  | Fuzzy       | 75.6  | 53     | 72.1   | 65.8 |
|                  | Hollow      | 77.9  | 51.1   | 72.4   | 68.2 |
|                  | Smooth      | 71.6  | 32.5   | 61     | 53.4 |
|                  | Symmetrical | 67.6  | 37.2   | 63     | 45.3 |

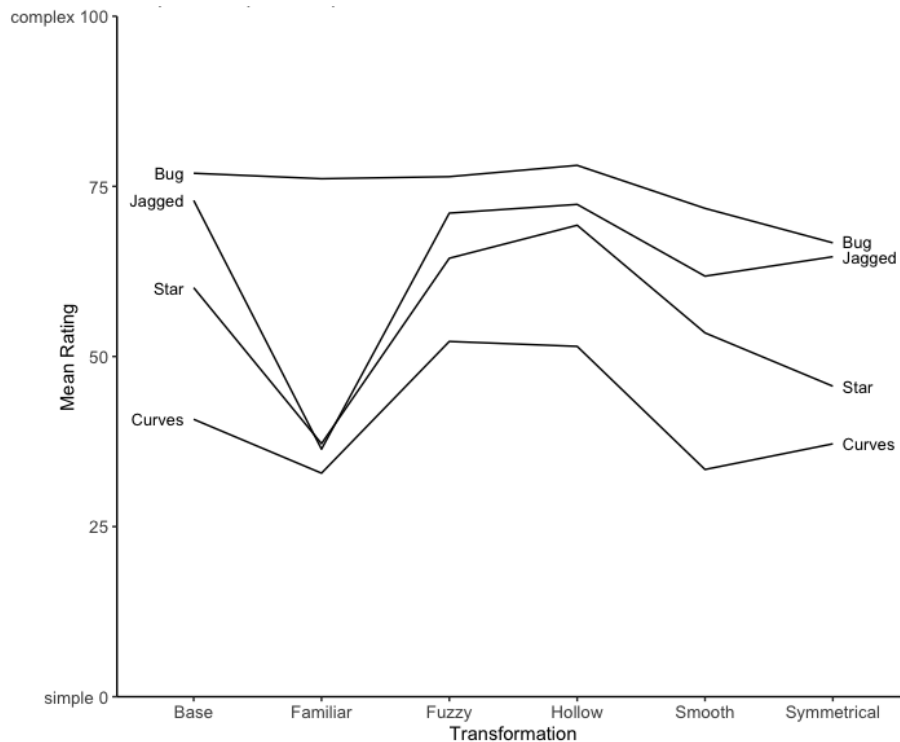

The familiar transform increased simplicity of all the shapes except the bug. The fuzzy transform moderately increased complexity for the Star and Curves, while the symmetrical transform increased simplicity for the Star.

S7: Sound: Recognizable-Arbitrary Scale

| Predictor               | df <sub>Num</sub> | df <sub>Den</sub> | SS <sub>Num</sub> | SS <sub>Den</sub> | F     | p    | $\eta^2_g$ |
|-------------------------|-------------------|-------------------|-------------------|-------------------|-------|------|------------|
| basesound               | 3                 | 141               | 24407.08          | 76037.29          | 15.09 | .000 | .07        |
| sotransform             | 5                 | 235               | 26377.28          | 78976.80          | 15.70 | .000 | .08        |
| basesound x sotransform | 15                | 705               | 9231.39           | 127625.24         | 3.40  | .000 | .03        |

| Recognizable     | Arbitrary   | Shape |        |        |      |
|------------------|-------------|-------|--------|--------|------|
| Lower            | Higher      | Bug   | Curves | Jagged | Star |
| <b>Transform</b> | Base        | 57    | 50.5   | 54.6   | 45.8 |
|                  | Familiar    | 38.7  | 47.6   | 50.6   | 33.7 |
|                  | Fuzzy       | 63.1  | 56.5   | 62.5   | 51.3 |
|                  | Hollow      | 58.8  | 51.7   | 58.2   | 45.6 |
|                  | Smooth      | 59.8  | 51.1   | 63     | 44.5 |
|                  | Symmetrical | 51    | 49.1   | 55.5   | 49.7 |

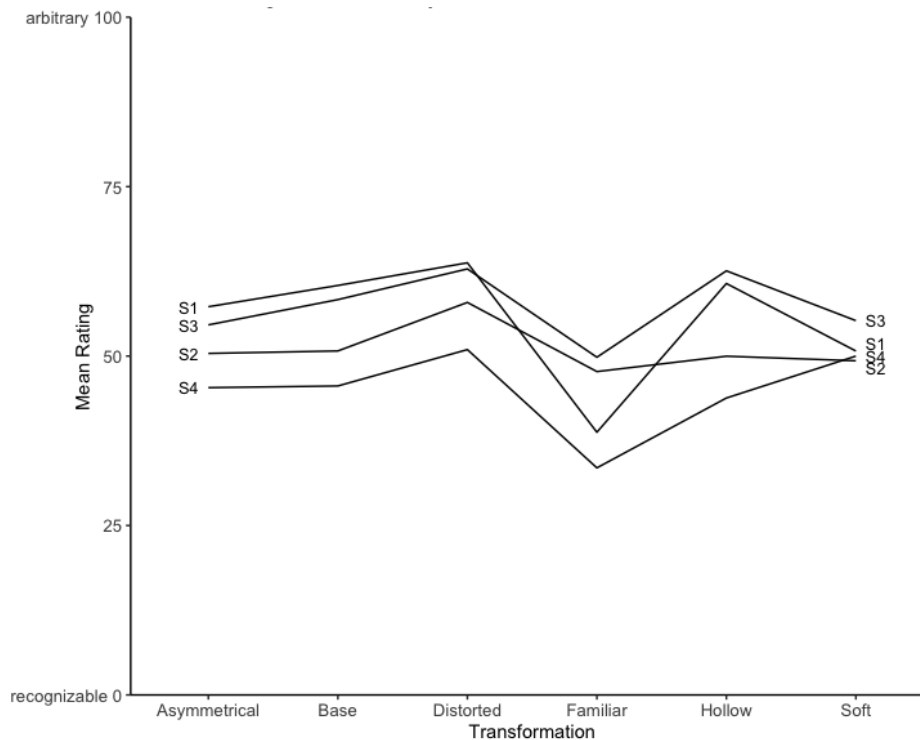

The familiar transform made sounds more recognizable. This effect was less marked for S2 and S3.



S8: Sound: Soft-Harsh Scale

| Predictor               | df <sub>Num</sub> | df <sub>Den</sub> | SS <sub>Num</sub> | SS <sub>Den</sub> | F     | p    | $\eta^2_g$ |
|-------------------------|-------------------|-------------------|-------------------|-------------------|-------|------|------------|
| basesound               | 3                 | 141               | 155865.03         | 79636.34          | 91.99 | .000 | .27        |
| sotransform             | 5                 | 235               | 84617.11          | 56672.63          | 70.18 | .000 | .15        |
| basesound x sotransform | 15                | 705               | 72714.39          | 126658.13         | 26.98 | .000 | .13        |

| Soft             | Harsh       | Shape |        |        |      |
|------------------|-------------|-------|--------|--------|------|
| Lower            | Higher      | Bug   | Curves | Jagged | Star |
| <b>Transform</b> | Base        | 82.6  | 69.8   | 60.6   | 36.5 |
|                  | Familiar    | 41.8  | 64.1   | 44.2   | 47.2 |
|                  | Fuzzy       | 84.6  | 74.5   | 71.6   | 41.5 |
|                  | Hollow      | 80.5  | 69.8   | 58.1   | 34   |
|                  | Smooth      | 71.3  | 67.5   | 55.8   | 33.8 |
|                  | Symmetrical | 38.3  | 46.6   | 51.9   | 32   |

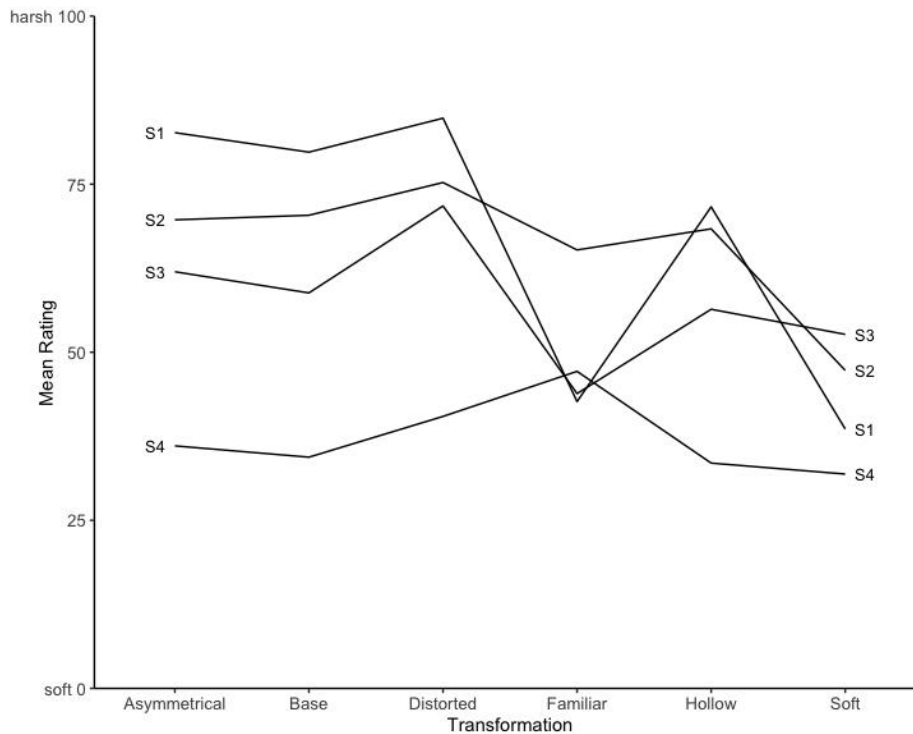

Softness was increased by the familiar transform for S1 and S3 sounds. The soft transform increased softness relative to the base for all sounds but the least for S3.

S9: Sound: Balanced-Unbalanced Scale

| Predictor               | df <sub>Num</sub> | df <sub>Den</sub> | SS <sub>Num</sub> | SS <sub>Den</sub> | F     | p    | $\eta^2_g$ |
|-------------------------|-------------------|-------------------|-------------------|-------------------|-------|------|------------|
| basesound               | 3                 | 141               | 69549.95          | 68006.28          | 48.07 | .000 | .17        |
| sotransform             | 5                 | 235               | 27486.68          | 82196.16          | 15.72 | .000 | .07        |
| basesound x sotransform | 15                | 705               | 29110.29          | 140341.32         | 9.75  | .000 | .07        |

| Balanced<br>Lower | Unbalanced<br>Higher | Shape |        |        |      |
|-------------------|----------------------|-------|--------|--------|------|
|                   |                      | Bug   | Curves | Jagged | Star |
| <b>Transform</b>  | Base                 | 61    | 54     | 56.8   | 35.4 |
|                   | Familiar             | 46.1  | 70     | 63.5   | 43.3 |
|                   | Fuzzy                | 72.2  | 57.9   | 61.8   | 42.6 |
|                   | Hollow               | 57.5  | 51.7   | 53.1   | 37.8 |
|                   | Smooth               | 61.5  | 57.9   | 60.9   | 37.7 |
|                   | Symmetrical          | 41.1  | 44.3   | 51.1   | 36.6 |

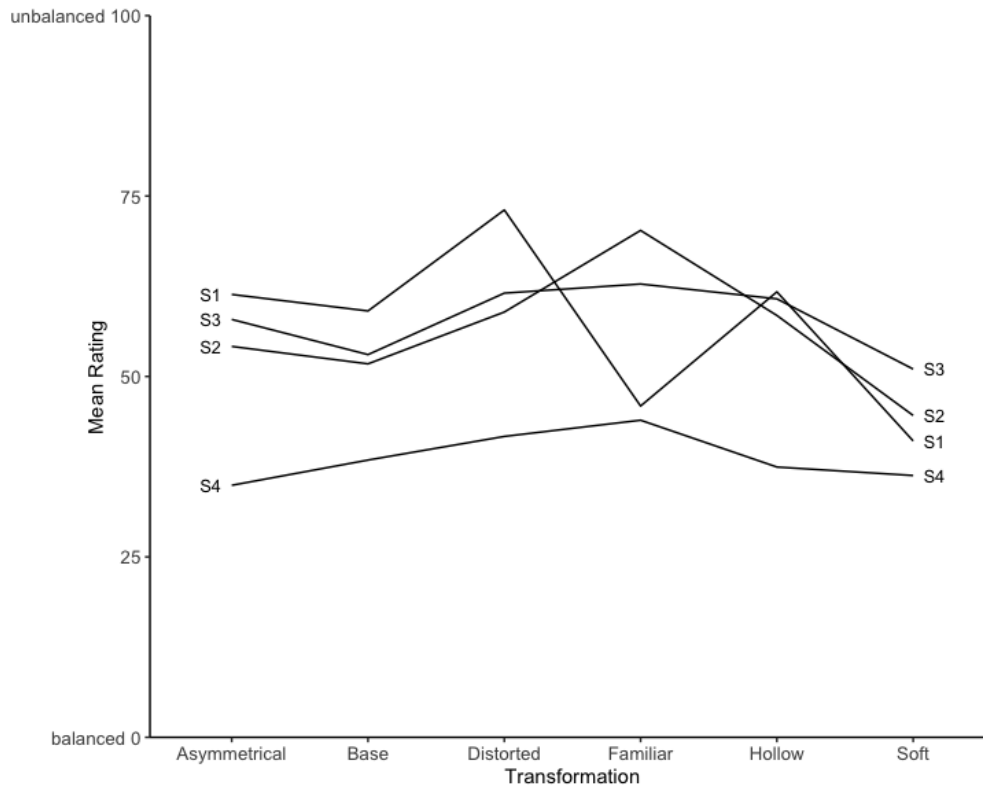

The familiar transform decreased balance for S2 while increasing it for S1.

S10: Sound: Hollow-Solid Scale

| Predictor               | df <sub>Num</sub> | df <sub>Den</sub> | SS <sub>Num</sub> | SS <sub>Den</sub> | F     | p    | $\eta^2_g$ |
|-------------------------|-------------------|-------------------|-------------------|-------------------|-------|------|------------|
| basesound               | 3                 | 141               | 38897.56          | 146788.02         | 12.45 | .000 | .08        |
| sotransform             | 5                 | 235               | 26566.47          | 89378.66          | 13.97 | .000 | .06        |
| basesound x sotransform | 15                | 705               | 20102.07          | 140357.99         | 6.73  | .000 | .04        |

| Hollow<br>Lower  | Solid<br>Higher | Shape  |        |      |      |
|------------------|-----------------|--------|--------|------|------|
|                  | Bug             | Curves | Jagged | Star |      |
| <b>Transform</b> | Base            | 65.3   | 62.9   | 56.3 | 45.7 |
|                  | Familiar        | 54.3   | 49.1   | 30.8 | 48.7 |
|                  | Fuzzy           | 64.2   | 64.1   | 53.2 | 49.1 |
|                  | Hollow          | 66.5   | 65.3   | 53.1 | 44.9 |
|                  | Smooth          | 54.8   | 58.1   | 52.3 | 40.9 |
|                  | Symmetrical     | 48.8   | 51.8   | 47.1 | 45.8 |

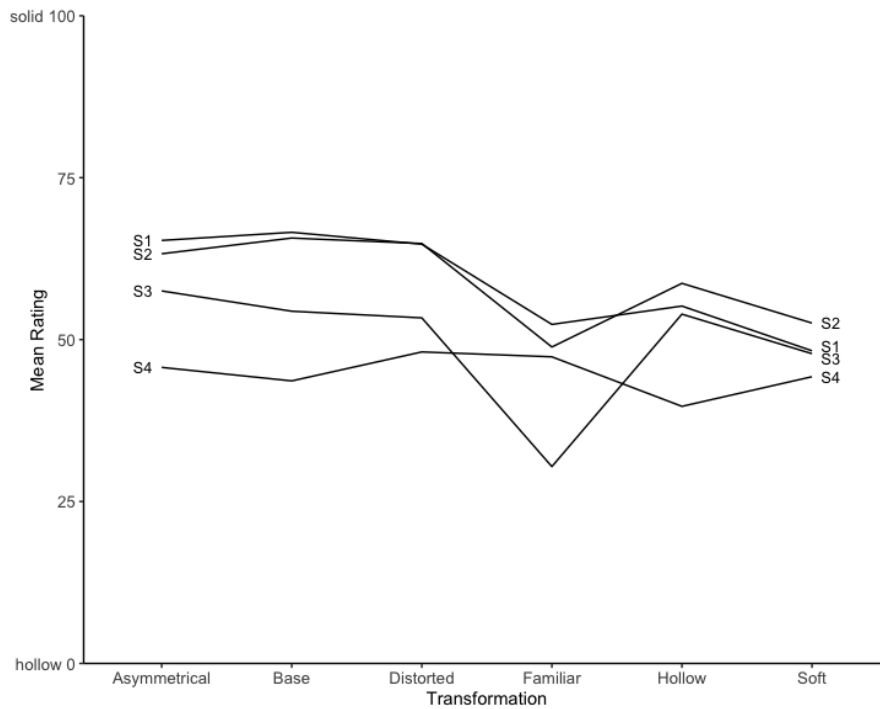

Hollowness was increased by the familiar transform for all sounds except S4.

S11: Sound: Clear-Distorted Scale

| Predictor               | df <sub>Num</sub> | df <sub>Den</sub> | SS <sub>Num</sub> | SS <sub>Den</sub> | F     | p    | $\eta^2_g$ |
|-------------------------|-------------------|-------------------|-------------------|-------------------|-------|------|------------|
| basesound               | 3                 | 141               | 57794.73          | 120012.64         | 22.63 | .000 | .12        |
| sotransform             | 5                 | 235               | 21608.97          | 81201.18          | 12.51 | .000 | .05        |
| basesound x sotransform | 15                | 705               | 29035.43          | 155912.16         | 8.75  | .000 | .06        |

| Clear            | Distorted   | Shape |        |        |      |
|------------------|-------------|-------|--------|--------|------|
| Lower            | Higher      | Bug   | Curves | Jagged | Star |
| <b>Transform</b> | Base        | 65.6  | 57.7   | 61.2   | 41.8 |
|                  | Familiar    | 40.3  | 63.6   | 61     | 40.3 |
|                  | Fuzzy       | 73.8  | 60.6   | 69.9   | 51.8 |
|                  | Hollow      | 65    | 54.5   | 59.5   | 43.3 |
|                  | Smooth      | 65.2  | 54.1   | 67.4   | 44.1 |
|                  | Symmetrical | 49.7  | 51.6   | 59     | 44.9 |

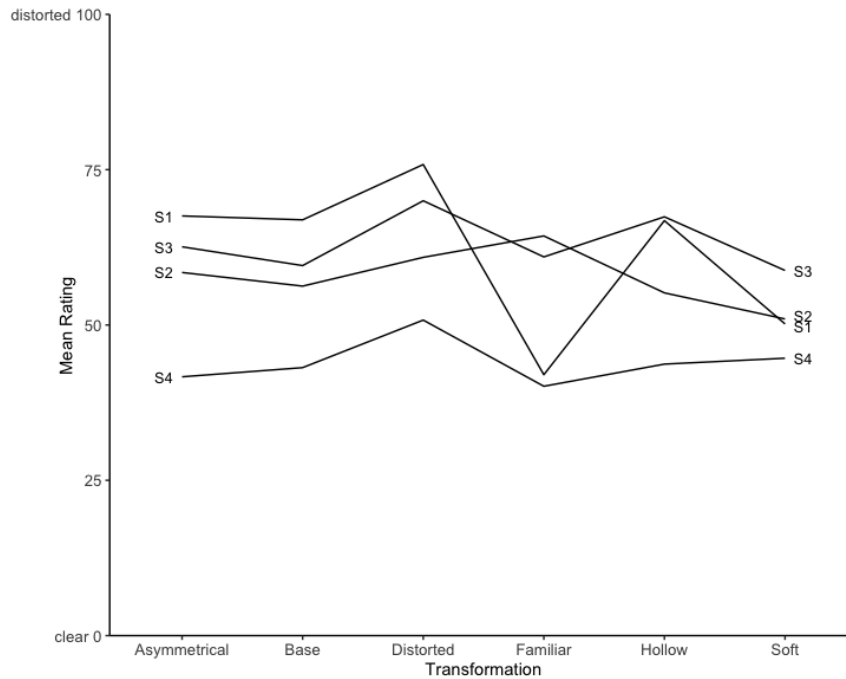

Only S1 was strongly affected by the familiar and soft transforms which increased S1's clearness. The distorted transform increased distortion moderately for all sounds.

## S12: Sound: Simple-Complex Scale

| Predictor               | df <sub>Num</sub> | df <sub>Den</sub> | SS <sub>Num</sub> | SS <sub>Den</sub> | F     | p    | $\eta^2_g$ |
|-------------------------|-------------------|-------------------|-------------------|-------------------|-------|------|------------|
| basesound               | 3                 | 141               | 26949.13          | 58527.78          | 21.64 | .000 | .08        |
| sotransform             | 5                 | 235               | 37341.45          | 73682.22          | 23.82 | .000 | .11        |
| basesound x sotransform | 15                | 705               | 37131.97          | 120852.74         | 14.44 | .000 | .10        |

*Note.* df<sub>Num</sub> indicates degrees of freedom numerator. df<sub>Den</sub> indicates degrees of freedom denominator. SS<sub>Num</sub> indicates sum of squares numerator. SS<sub>Den</sub> indicates sum of squares denominator.  $\eta^2_g$  indicates generalized eta-squared.

| Simple<br>Lower  | Complex<br>Higher | Shape |        |        |      |
|------------------|-------------------|-------|--------|--------|------|
|                  |                   | Bug   | Curves | Jagged | Star |
| <b>Transform</b> | Base              | 56.4  | 50.4   | 49.6   | 34.9 |
|                  | Familiar          | 45.3  | 56.9   | 53.9   | 63.5 |
|                  | Fuzzy             | 67.1  | 53.7   | 57.3   | 41   |
|                  | Hollow            | 56.7  | 50.9   | 45.8   | 34.9 |
|                  | Smooth            | 63    | 54.9   | 57.7   | 41.3 |
|                  | Symmetrical       | 38.6  | 40.2   | 44     | 34.1 |

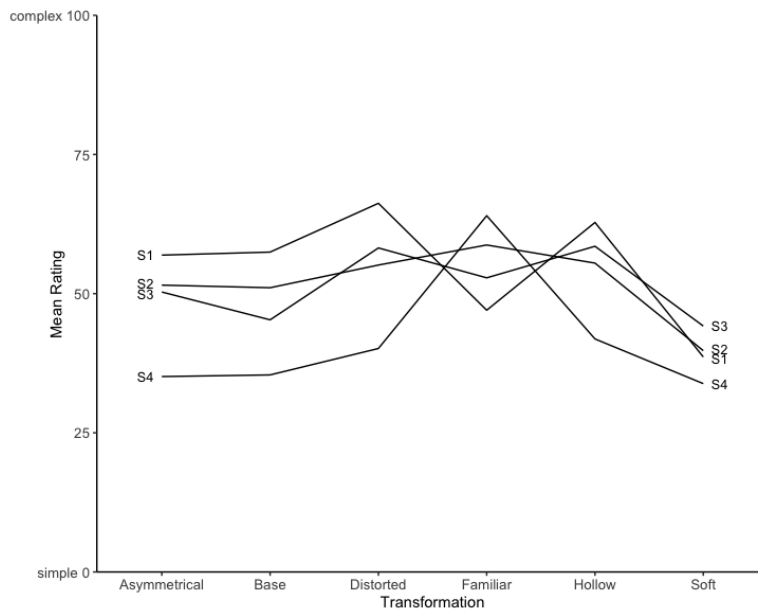

The distorted transform increased complexity moderately for all sounds while the familiar transform had opposite effects on S4 (increasing complexity) and S1 (decreasing complexity). The hollow transform increased complexity for S3.
